# Supplementary material
Source: Springer Nature journal article supplement (https://www.springermedizin.de/resource/supplementary/12889_2012_5824_MOESM3_ESM.pdf/9496206)
Supplement: MOESM3 [file 9496206]

Survey surveillance discrepancy for HIV

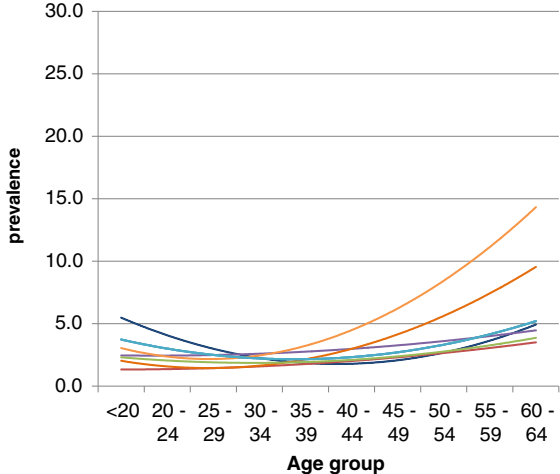

- SSD diagnosed prevalence Netherlands
- SSD diagnosed prevalence Germany
- SSD diagnosed prevalence Sweden
- SSD diagnosed prevalence Czech Rep 2%
- SSD diagnosed prevalence Czech Rep 3%
- SSD diagnosed prevalence Portugal
- SSD diagnosed prevalence United Kingdom
